# Supplementary material
Source: PubMed Central journal article supplement (PMC6260225)
Supplement: mmc1.pdf [file mmc1.pdf]

**Biophysical Journal, Volume 115**

**Supplemental Information**

**Modeling Structure, Stability, and Flexibility of Double-Stranded RNAs  
in Salt Solutions**

**Lei Jin, Ya-Zhou Shi, Chen-Jie Feng, Ya-Lan Tan, and Zhi-Jie Tan**

## 1 **The energy functions of the coarse-grained model**

2 The force field in the present coarse-grained (CG) model contains two parts, the bonded  
3 potential and nonbonded potential:

$$4 \quad U_{total} = U_{bonded} + U_{nonbonded}. \quad (S1)$$

5 The bonded potential  $U_{bonded}$  including energies of bond length  $U_b$ , bond angle  $U_a$  and  
6 dihedral angle  $U_d$ , is used to describe the local connectivity between CG beads:

$$U_{bonded} = U_b + U_a + U_d, \quad (S2)$$

7 where

$$U_b = \sum_{bonds} K_b (r - r_0)^2, \quad (S3)$$

$$U_a = \sum_{angles} K_\theta (\theta - \theta_0)^2, \quad (S4)$$

$$U_d = \sum_{dihedrals} \left\{ K_\varphi [1 - \cos(\varphi - \varphi_0)] + \frac{1}{2} K_\varphi [1 - \cos 3(\varphi - \varphi_0)] \right\}. \quad (S5)$$

8 In Eqs. S3-S5,  $K_b$ ,  $K_\theta$  and  $K_\varphi$  represent the energy strength;  $r_0$ ,  $\theta_0$  and  $\varphi_0$  are the  
9 corresponding values at energy minimum. The initial parameters of these three potentials were  
10 derived from the Boltzmann inversion of corresponding atomistic distribution functions obtained  
11 from the statistical analysis on the experimental structures in the Protein Data Bank (PDB,  
12 <https://www.rcsb.org/>). The bonded potential works only on the CG beads in each single-stranded  
13 chain, and two sets of parameters  $Para_{helical}$  and  $Para_{nonhelical}$  are provided for CG beads in  
14 base-pairing and non-base-pairing regions, respectively. It should be noted that the  $Para_{nonhelical}$  is  
15 used in folding process and the  $Para_{helical}$  is used only for helical parts in structure refinement process;  
16 see more details in Refs. 1 and 2. The nonbonded potential  $U_{nonbonded}$  in Eq. S1 is used to describe  
17 nonbonded interactions between CG beads intra- or inter-chains, and it includes hydrogen bond  
18 potential  $U_{bp}$ , base pairs stacking potential  $U_{bc}$ , coaxial stacking potential  $U_{cs}$ , excluded volume  
19 potential  $U_{exc}$ , and electrostatic potential  $U_{el}$ :

$$U_{nonbonded} = U_{bp} + U_{bc} + U_{cs} + U_{exc} + U_{el}. \quad (S6)$$

1 The hydrogen bond potential is calculated for every possible base pair (G-C, A-U and G-U) and is  
 2 given by

$$U_{bp} = \sum_{i < j-3}^{N_{bp}} \frac{\varepsilon_{bp}}{1 + k_{NN} (r_{N_i N_j} - r_{NN})^2 + k_{CN} \sum_{i(j)} (r_{C_i N_j} - r_{CN})^2 + k_{PN} \sum_{i(j)} (r_{P_i N_j} - r_{PN})^2}, \quad (S7)$$

3 where  $\varepsilon_{bp}$  ( $\varepsilon_{GC} = 2\varepsilon_{AU} = 2\varepsilon_{GU}$ ) is the interaction strength.  $r_{NN}$ ,  $r_{CN}$  and  $r_{PN}$  are three distances  
 4 between the corresponding atoms of P, C and N in two paired nucleotides to determine whether the  
 5 base-pair is well formed.  $k_{NN}$ ,  $k_{CN}$  and  $k_{PN}$  are the corresponding energy strength. The base pairs  
 6 stacking potential is calculated between every two nearest neighbor base pairs and is given by

$$U_{bs} = \frac{1}{2} \sum_{i,j}^{N_{bs}} |G_{i,i+1,j-1,j}| \left\{ \left[ 5 \left( \frac{\sigma_{st}}{r_{i,i+1}} \right)^{12} - 6 \left( \frac{\sigma_{st}}{r_{i,i+1}} \right)^{10} \right] + \left[ 5 \left( \frac{\sigma_{st}}{r_{j,j-1}} \right)^{12} - 6 \left( \frac{\sigma_{st}}{r_{j,j-1}} \right)^{10} \right] \right\}, \quad (S8)$$

7 where  $\sigma_{st}$  is the optimum distance of two neighbor bases in the known helix structures and  
 8  $G_{i,i+1,j-1,j}$  is the strength of base stacking energy and can be estimated from the combination of the  
 9 experimental thermodynamics parameters (3) and Monte Carlo simulations; see more details in Refs.  
 10 1 and 2. The coaxial stacking potential is calculated between two discontinuous neighbor helices and  
 11 is given by

$$U_{cs} = \frac{1}{2} \sum_{i-j,k-l}^{N_{cs}} |G_{i-j,k-l}| \{ [1 - e^{-a(r_{ik} - r_{cs})}]^2 + [1 - e^{-a(r_{jl} - r_{cs})}]^2 - 2 \}, \quad (S9)$$

12 where  $G_{i-j,k-l}$  is the sequence-dependent base stacking strength, which is approximately taken as the  
 13 stacking strength between the corresponding nearest neighbor base-pairs in an uninterrupted helix  
 14 (3-5), and  $r_{cs}$  is the optimum distance between two coaxially stacked stems, which is directly  
 15 obtained from the statistical analysis on the known structures in PDB; see more details in Ref. 2. The  
 16 excluded volume potential represents the excluded volume interaction between the nonbonded CG  
 17 beads and is given by

$$U_{exc} = \sum_{i < j}^N \begin{cases} 4\varepsilon \left[ \left( \frac{\sigma_0}{r_{ij}} \right)^{12} - \left( \frac{\sigma_0}{r_{ij}} \right)^6 \right] & \text{if } r_{ij} \leq \sigma_0, \\ 0 & \text{if } r_{ij} > \sigma_0 \end{cases}, \quad (S10)$$

18 where  $\varepsilon = 0.26$  kcal/mol and  $\sigma_0$  is the sum of the radii of bead  $i$  and  $j$ .

19 The structure based electrostatic potential is newly introduced in the present model to represent

1 the electrostatic interactions between charged  $P$  beads, and it is treated as a combination of  
 2 Debye-Hückel approximation and the counterion condensation (CC) theory (1, 6):

$$U_{el} = \sum_{i < j}^N \frac{Q_i Q_j e^2}{4\pi\epsilon_0\epsilon r_{ij}} e^{-\frac{r_{ij}}{l_D}}. \quad (\text{S11})$$

3 Here,  $r_{ij}$  is the distance between the  $i$ -th and  $j$ -th  $P$  beads, and  $l_D$  is the Debye length. The reduced  
 4 charge  $Q_i$  on the  $i$ -th  $P$  bead is

$$Q_i = 1 - f_i, \quad (\text{S12})$$

5 where  $f_i$  is ion neutralization fraction. Here, beyond the assumption of uniform distribution of  
 6 binding ions along RNA chain,  $f_i$  is RNA structure-dependent and includes the contributions of  
 7 monovalent and divalent ions  
 8

$$f_i = x f_i^1 + (1 - x) f_i^2, \quad (\text{S13})$$

9 where  $f_i^\nu$  ( $\nu = 1, 2$ ) is the binding fraction of  $\nu$ -valent ions for the  $i$ -th  $P$  bead.  $x$  and  $(1 - x)$   
 10 represent the contribution fractions of monovalent and divalent ions which can be derived from the  
 11 Tightly Bound Ion (TBI) model (7-9). If we use  $\text{Na}^+$  and  $\text{Mg}^{2+}$  to represent monovalent and divalent  
 12 ions respectively,  $x$  can be given by the empirical formula

$$x = \frac{[\text{Na}^+]}{[\text{Na}^+] + \alpha[\text{Mg}^{2+}]}, \quad (\text{S14})$$

13 where  $\alpha = (8.1 - 64.8/N)(5.2 - \ln[\text{Na}^+])$ ,  $[\text{Na}^+]$  and  $[\text{Mg}^{2+}]$  are the corresponding bulk  
 14 concentrations and  $N$  is the chain length (7-10); see more details in Ref. 2.

15 To further refine the electrostatic potential based on RNA structure,  $f_i^\nu$  is given by

$$f_i^\nu = \frac{N \bar{f}_i^\nu}{\sum_N e^{-\beta\nu\phi_i}} e^{-\beta\nu\phi_i}. \quad (\text{S15})$$

16 Here,  $\bar{f}_i^\nu$  represents the average neutralization fraction for the  $i$ -th  $P$  bead and can be given by the  
 17 CC theory (6):  $\bar{f}_i^\nu = 1 - (\frac{b}{\nu l_B})$ , where  $b$  is the average charge spacing on RNA backbone and  $l_B$  is  
 18 Bjerrum length.  $\phi_i$  in Eq. S15 is the electrostatic potential at the  $i$ -th  $P$  bead and can be  
 19 approximately calculated by

$$\phi_i = \sum_{i \neq j}^N \frac{l_B Q_j}{r_{ij}} e^{-\frac{r_{ij}}{l_D}}. \quad (\text{S16})$$

20 Therefore, the structure-dependent  $Q_i$  needs to be obtained through an iteration process by Eqs.  
 21 S12-S16.

## 1 **Calculating melting temperature at low experimental strand concentration**

2 Since the experimental strand concentration of a dsRNA is generally very low, to improve the  
 3 computation efficiency, the simulations for dsRNAs are generally performed at high strand  
 4 concentrations  $C_s^h$  (e.g. 10 mM) to calculate melting temperatures. Based on the equilibrium  
 5 conformations at each temperature  $T$ , the fraction  $\Phi(T)$  of unfolded state characterized as  
 6 completely dissociated single-stranded chain can be obtained at  $T$ . Since the small system of the  
 7 simulation (two strands in a simulational box) can lead to significant finite-size effect (11), the  
 8 predicted  $\Phi(T)$  needs to be further corrected to the fraction  $\theta_h(T)$  of unfolded state at the high  
 9 bulk strand concentration  $C_s^h$  (11):

$$\theta_h(T) = 1 - \left(1 + \frac{\Phi(T)}{2a(1 - \Phi(T))}\right) + \sqrt{\left(1 + \frac{\Phi(T)}{2a(1 - \Phi(T))}\right)^2 - 1}, \quad (\text{S17})$$

10 where  $a=1$  and  $2$  for nonself-complementary and self-complementary sequences, respectively (11).  
 11 Meanwhile, the ratio of folded to unfolded state  $\phi(T)$  at each temperature can be written as

$$\phi(T) = \frac{Z_f}{Z_u} = e^{-\beta\Delta G_h}, \quad (\text{S18})$$

12 where  $Z_f$  and  $Z_u$  are the partition functions of the ensembles of folded and unfolded states,  
 13 respectively.  $\Delta G_h$  is the Helmholtz free energy change of the system due to the transition from  
 14 unfolded state to folded state and  $\beta = \frac{1}{k_B T}$ . Hence,  $\theta_h(T)$  can also be written as

$$\theta_h(T) = 1 - \frac{\phi(T)}{1 + \phi(T)} = \frac{1}{1 + e^{-\beta\Delta G_h}}. \quad (\text{S19})$$

15 Since the contribution of the translation entropy determined by the strand concentration can be  
 16 derived as  $k_B \ln C_s^h / \mu$  (12),  $\Delta G_h$  can be derived as

$$\Delta G_h = \Delta G_0 - k_B T \ln C_s^h / \mu, \quad (\text{S20})$$

17 where  $\Delta G_0$  is the free energy change only depending on sequence, and  $\mu = 1$  for  
 18 self-complementary sequences and  $\mu = 4$  for nonself-complementary sequences (12). Similarly, For  
 19 a low experimental strand concentration  $C_s$  (e.g., 0.1 mM), the fraction  $\theta(T)$  of unfolded state can  
 20 also be written as

$$\theta(T) = \frac{1}{1 + e^{-\beta\Delta G}}, \quad (\text{S21})$$

1 and

$$\Delta G = \Delta G_0 - k_B T \ln C_s / \mu. \quad (\text{S22})$$

2 Then, based on the Eqs. S18-S22,  $\theta(T)$  at low experimental strand concentration can be calculated  
3 by

$$\theta(T) = \frac{\lambda \theta_h(T)}{1 + \lambda \theta_h(T) - \theta_h(T)}, \quad (\text{S23})$$

4 where  $\lambda = C_s^h / C_s$ . Furthermore, based on the fraction  $\theta(T)$  of unfolded state, the melting curve  
5 can be obtained by fitting to

$$\theta(T) = 1 - \frac{1}{1 + e^{(T-T_m)/dT}}, \quad (\text{S24})$$

6 where  $dT$  is an adjustable parameter (1,2).

7

8

1

**Table S1. The parameters of bonded potential**

| Bond $U_b$                                                      |                                         |                            |                         |                            |
|-----------------------------------------------------------------|-----------------------------------------|----------------------------|-------------------------|----------------------------|
|                                                                 | $K_b$ (kcal/mol/Å <sup>2</sup> )        |                            | $r_0$ (Å)               |                            |
|                                                                 | Para <sub>helical</sub>                 | Para <sub>nonhelical</sub> | Para <sub>helical</sub> | Para <sub>nonhelical</sub> |
| P <sub>i</sub> C <sub>i</sub>                                   | 133.4                                   | 98.2                       | 3.95                    | 3.95                       |
| C <sub>i</sub> P <sub>i+1</sub>                                 | 75.0                                    | 42.5                       | 3.93                    | 3.93                       |
| C <sub>i</sub> N <sub>i</sub>                                   | 85.6                                    | 24.8                       | 3.35                    | 3.45                       |
| Angle $U_a$                                                     |                                         |                            |                         |                            |
|                                                                 | $K_\theta$ (kcal/mol/rad <sup>2</sup> ) |                            | $\theta_0$ (rad)        |                            |
|                                                                 | Para <sub>helical</sub>                 | Para <sub>nonhelical</sub> | Para <sub>helical</sub> | Para <sub>nonhelical</sub> |
| P <sub>i</sub> C <sub>i</sub> P <sub>i+1</sub>                  | 18.3                                    | 9.3                        | 1.74                    | 1.75                       |
| C <sub>i-1</sub> P <sub>i</sub> C <sub>i</sub>                  | 43.9                                    | 21.3                       | 1.76                    | 1.78                       |
| P <sub>i</sub> C <sub>i</sub> N <sub>i</sub>                    | 35.5                                    | 9.7                        | 1.63                    | 1.64                       |
| N <sub>i</sub> C <sub>i</sub> P <sub>i+1</sub>                  | 99.8                                    | 15.2                       | 1.66                    | 1.66                       |
| Dihedral $U_d$                                                  |                                         |                            |                         |                            |
|                                                                 | $K\phi$ (kcal/mol)                      |                            | $\phi_0$ (rad)          |                            |
|                                                                 | Para <sub>helical</sub>                 | Para <sub>nonhelical</sub> | Para <sub>helical</sub> | Para <sub>nonhelical</sub> |
| P <sub>i</sub> C <sub>i</sub> P <sub>i+1</sub> C <sub>i+1</sub> | 2.8                                     | 1.1                        | 2.56                    | 2.51                       |
| C <sub>i-1</sub> P <sub>i</sub> C <sub>i</sub> P <sub>i+1</sub> | 10.5                                    | 4.3                        | -2.94                   | -2.92                      |
| C <sub>i-1</sub> P <sub>i</sub> C <sub>i</sub> N <sub>i</sub>   | 3.8                                     | 0.8                        | -1.16                   | -1.18                      |
| N <sub>i-1</sub> C <sub>i-1</sub> P <sub>i</sub> C <sub>i</sub> | 4.2                                     | 0.7                        | 0.88                    | 0.78                       |

2

3

1

**Table S2. The parameters of nonbonded potential**

|           |                                   |                     |                        |           |
|-----------|-----------------------------------|---------------------|------------------------|-----------|
| $U_{exc}$ | $\varepsilon$ (kcal/mol)          | 0.26                | $\sigma_{st}$ (Å)      | $R_i+R_j$ |
|           | $\varepsilon_{bp(GC)}$ (kcal/mol) | -3.5                |                        |           |
| $U_{bp}$  | $k_{NN}$ (Å <sup>-2</sup> )       | 3.6                 | $r_{NN}$ (Å)           | 8.9       |
|           | $k_{CN}$ (Å <sup>-2</sup> )       | 1.9                 | $r_{CN}$ (Å)           | 12.2      |
|           | $k_{PN}$ (Å <sup>-2</sup> )       | 0.7                 | $r_{PN}$ (Å)           | 13.9      |
| $U_{bs}$  | $G_{i,i+1,j-1,j}$ (kcal/mol)      | Sequence-dependent  | $\sigma_{st}$ (Å)      | 4.8       |
| $U_{el}$  | $Q_i$                             | Structure-dependent | $b$ (Å)                | 5.5       |
| $U_{cs}$  | $G_{i,j,k-l}$ (kcal/mol)          | Sequence-dependent  | $a$ (Å <sup>-1</sup> ) | 0.4       |
|           |                                   |                     | $r_{cs}$ (Å)           | 5.0       |

2

3



1

**Table S3. 16 dsRNAs in X-ray set for structure prediction at 1 M [Na<sup>+</sup>]**

| PDB code | Description <sup>a</sup> | Length (nt) | Base pairs <sup>b</sup> (bp) | RMSD <sub>mean</sub> (Å) | RMSD <sub>min</sub> (Å) |
|----------|--------------------------|-------------|------------------------------|--------------------------|-------------------------|
| 472d     | H                        | 16          | 8                            | 1.6                      | 0.6                     |
| 259d     | H                        | 16          | 8                            | 1.5                      | 0.7                     |
| 1dqf     | B                        | 19          | 9                            | 2.5                      | 1.6                     |
| 2ao5     | H                        | 20          | 10                           | 2.9                      | 1.2                     |
| 1kd5     | I                        | 22          | 6                            | 4.1                      | 2.1                     |
| 1qcu     | H                        | 22          | 11                           | 2.1                      | 1.1                     |
| 1yyk     | H                        | 24          | 12                           | 2.5                      | 1.1                     |
| 353d     | H                        | 24          | 12                           | 2.9                      | 1.2                     |
| 157d     | I                        | 24          | 10                           | 2.4                      | 1.1                     |
| 255d     | I                        | 24          | 10                           | 2.1                      | 1.4                     |
| 283d     | I                        | 24          | 8                            | 2.5                      | 1.6                     |
| 1i9x     | B                        | 26          | 12                           | 3.8                      | 1.7                     |
| 1mhk     | T                        | 26          | 6                            | 1.9 (9.8) <sup>c</sup>   | 1.2 (5.6) <sup>c</sup>  |
| 1csl     | B&I                      | 28          | 9                            | 4.2                      | 2.2                     |
| 3wbm     | B&I                      | 50          | 20                           | 5.4                      | 2.3                     |
| 2f8t     | T                        | 50          | 22                           | 5.2                      | 2.7                     |

<sup>a</sup> H stands for dsRNAs of complementary duplex, B stands for dsRNAs with bulge loop, I stands for dsRNAs with internal loop, and T stands for dsRNAs with single-stranded tail.

<sup>b</sup> Only Watson-Crick base pairs (G-C and A-U) and Wobble base pairs (G-U) are concluded.

<sup>c</sup> The RMSD in bracket is calculated with the involvement of dangling tails.

2

1  
2**Table S4. The comparison between the present model and its previous version in RNA structure predictions**

| PDB code | Description <sup>a</sup> | Length (nt) | [Na <sup>+</sup> /K <sup>+</sup> ]/[Mg <sup>2+</sup> ] <sup>b</sup><br>mM/mM | mean/minimum RMSDs <sup>c</sup> (Å) |                          |
|----------|--------------------------|-------------|------------------------------------------------------------------------------|-------------------------------------|--------------------------|
|          |                          |             |                                                                              | Previous version <sup>d</sup>       | New version <sup>e</sup> |
| 2gm0     | D,I                      | 70          | 250/0.1                                                                      | 7.3/3.9                             | 6.1/3.1                  |
| 2m1o     | D,H                      | 14          | 80/0.1                                                                       | 2.2/0.7                             | 2.0/0.7                  |
| 1tut     | D,I                      | 22          | 80/3                                                                         | 3.5/1.9                             | 3.2/1.7                  |
| 2kyd     | D,H                      | 40          | 150/10                                                                       | 3.9/1.2                             | 3.7/1.2                  |
| 2d1a     | D,I                      | 78          | 50/0                                                                         | 7.3/3.9                             | 6.9/3.8                  |
| 2dd1     | D,I                      | 20          | 90/0                                                                         | 3.5/1.7                             | 3.3/1.5                  |
| 2k7e     | D,I                      | 24          | 110/0                                                                        | 2.8/1.4                             | 2.4/1.3                  |
| 2lx1     | D,I                      | 22          | 90/0                                                                         | 5.4/2.8                             | 4.8/2.4                  |
| 2jxq     | D,H                      | 20          | 60/0                                                                         | 2.1/0.8                             | 2.0/0.8                  |
| 1f5g     | D,I                      | 20          | 80/0                                                                         | 3.0/1.8                             | 2.8/1.7                  |
| 1j4y     | S                        | 17          | 20/0                                                                         | 3.9/1.9                             | 3.8/1.9                  |
| 1d0u     | S,B                      | 21          | 50/0                                                                         | 3.8/1.5                             | 3.5/1.4                  |
| 2l5z     | S,I                      | 26          | 50/5                                                                         | 4.0/2.6                             | 3.6/2.2                  |
| 1p5o     | S,B,I                    | 77          | 100/5                                                                        | 11.0/8.7                            | 9.8/6.6                  |
| 2g1w     | S,P                      | 22          | 50/0                                                                         | 4.8/3.3                             | 4.1/2.2                  |
| 2rp1     | S,P                      | 27          | 110/5                                                                        | 4.1/2.7                             | 3.9/2.4                  |
| 1kpy     | S,P                      | 33          | 100/5                                                                        | 4.2/2.4                             | 3.9/2.2                  |
| 2ap5     | S,P                      | 28          | 100/5                                                                        | 5.6/3.8                             | 4.9/3.3                  |

<sup>a</sup> D stands for dsRNA, S stands for ssRNA, H stands for complementary duplex, B stands for bulge loop, I stands for internal loop, and P stands for pseudoknot.

<sup>b</sup> The experimental ion conditions for structure determination by NMR method.

<sup>c</sup> The RMSDs are calculated over all three CG beads of predicted structures by the present model from the corresponding atoms of the native structures.

<sup>d</sup> Using electrostatic potential described in Refs. 2 and 13.

<sup>e</sup> Using electrostatic potential described in this work.

3

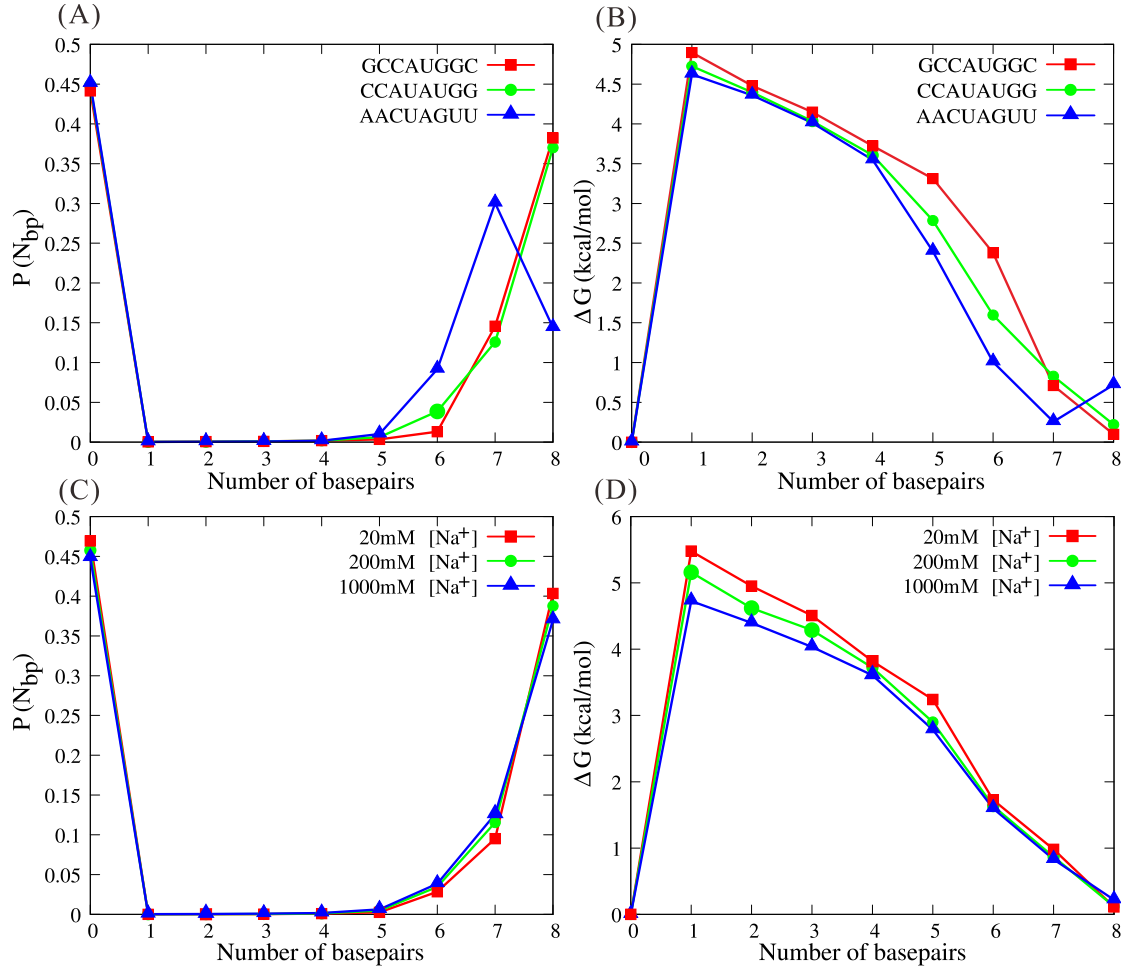

1

2 FIGURE S1. (A, B) The normalized populations of formed base pair number  $P(N_{bp})$  (A) and the  
 3 free energy barrier  $\Delta G$  (B) as functions of the number of base pairs of three sequences at  $T_m$ . (C, D)  
 4 The normalized populations of formed base pair number  $P(N_{bp})$  (C) and the free energy barrier  
 5  $\Delta G$  (D) of the sequence CCAUAUGG at  $T_m$  at different  $[\text{Na}^+]$ 's. Here, the free energies are  
 6 calculated by  $\Delta G = -k_B T \ln[P(N_{bp})]$ .

7

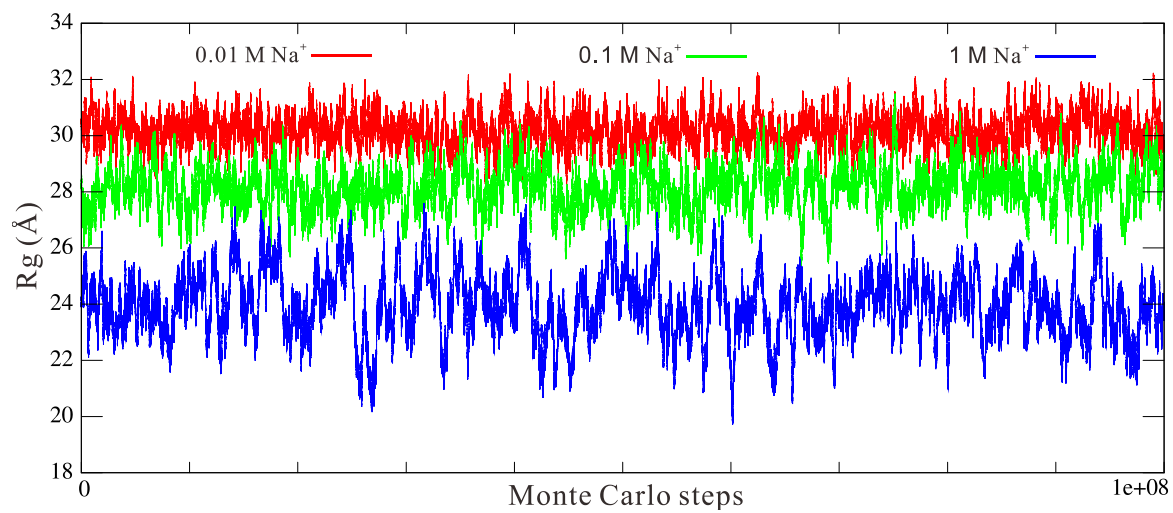

1

2 Figure S2. The time-evolution of the radius of gyration for the 40-bp dsRNA helix at different Na<sup>+</sup>  
3 concentration.

4

1

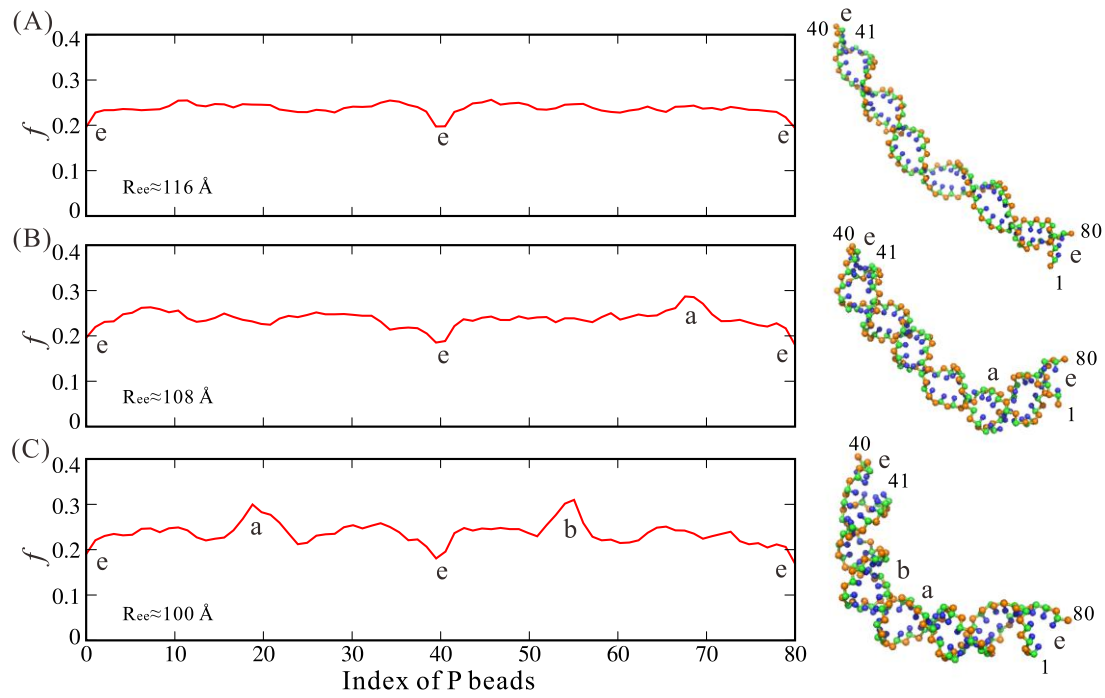

2

3 Figure S3. The calculated ion charge neutralization fraction  $f$  (left) along P beads of the  
4 corresponding structures (right) with the end-to-end distances  $Re_e$  of  $\sim 116 \text{ \AA}$  (A),  $\sim 108 \text{ \AA}$  (B) and  
5  $\sim 100 \text{ \AA}$  (C) of the 40-bp dsRNA at  $0.1 \text{ M } [\text{Na}^+]$ . The P beads in the bending region of the structures  
6 are labeled with a and b corresponding to the peaks of ion charge neutralization fraction, and the  
7 ends of the helix are labeled with e corresponding to the ion charge neutralization fraction troughs.

8

## 1 **References:**

- 2 1 Shi, Y. Z., Wang, F. F., Wu, Y. Y., and Tan, Z. J. 2014. A coarse-grained model with implicit salt for RNAs:  
3 Predicting 3D structure, stability and salt effect. *J. Chem. Phys.*, 141. 105102.
- 4 2 Shi, Y. Z., Jin, L., Wang, F. F., Zhu, X. L., and Tan, Z. J. 2015. Predicting 3D Structure, Flexibility, and  
5 Stability of RNA Hairpins in Monovalent and Divalent Ion Solutions. *Biophys. J.*, 109. 2654-2665.
- 6 3 Xia, T., SantaLucia, J., Burkard, M. E., Kierzek, R., Schroeder, S. J., Jiao, X., Cox, C., and Turner, D. H. 1998.  
7 Thermodynamic Parameters for an Expanded Nearest-Neighbor Model for Formation of RNA Duplexes with  
8 Watson-Crick Base Pairs. *Biochemistry*, 37. 14719-14735.
- 9 4 Walter, A. E., Turner, D. H., Kim, J., Lyttle, M. H., Muller, P., Mathews, D. H., and Zuker, M. 1994. Coaxial  
10 stacking of helices enhances binding of oligoribonucleotides and improves predictions of RNA folding. *Proc.*  
11 *Natl. Acad. Sci. USA.*, 91. 9218-22.
- 12 5 Walter, A. E. and Turner, D. H. 1994. Sequence dependence of stability for coaxial stacking of RNA helices  
13 with Watson-Crick base paired interfaces. *Biochemistry*, 33. 12715-9.
- 14 6 Manning, G. S. 1978. The molecular theory of polyelectrolyte solutions with applications to the electrostatic  
15 properties of polynucleotides. *Q. Rev. Biophys.*, 11. 179-246.
- 16 7 Tan, Z. J. and Chen, S. J. 2005. Electrostatic correlations and fluctuations for ion binding to a finite length  
17 polyelectrolyte. *J. Chem. Phys.*, 122. 044903.
- 18 8 Tan, Z. J. and Chen, S. J. 2011. Salt Contribution to RNA Tertiary Structure Folding Stability. *Biophys. J.*,  
19 101. 176-187.
- 20 9 Wang, F. H., Wu, Y. Y. and Tan, Z. J. 2013. Salt Contribution to the Flexibility of Single-Stranded Nucleic  
21 Acid of Finite Length. *Biopolymers*, 99. 370-381.
- 22 10 Xi, K., Wang, F. H., Xiong, G., Zhang, Z. L. and Tan, Z. J. 2018. Competitive binding of  $Mg^{2+}$  and  $Na^+$  ions  
23 to nucleic acids: from helices to tertiary structures. *Biophys. J.*, 114. 1776-1790.
- 24 11 Ouldridge, T. E., Louis, A. A. and Doye, J. P. 2010. Extracting bulk properties of self-assembling systems  
25 from small simulations. *J. Phys. Condens. Matt.*, 22, 104102.
- 26 12 Borer, P. N., Dengler, B., Tinoco, I. J., and Uhlenbeck, O. C. 1974. Stability of ribonucleic acid  
27 double-stranded helices. *J. Mol. Biol.*, 86. 843-53.
- 28 13 Shi, Y. Z, Jin, L., Feng, C. J., Tan, Y. L. and Tan, Z. J. 2018. Predicting 3D structure and stability of RNA  
29 pseudoknots in monovalent and divalent ion solutions. *PLoS Comput. Biol.*, 14(6), e1006222.
